# Supplementary material for: Remarkable high-temperature Li-storage performance of few-layer graphene-anchored Fe3O4 nanocomposites as an anode
Source: Royal Society of Chemistry journal article supplement (doi:10.1039/c7ta07364j), 2017-01-01
Supplement: c7ta07364j1.pdf [file c7ta07364j1.pdf]

## Electronic Supplementary Information for

### Remarkable high-temperature Li-storage performance of few-layer graphene-anchored Fe<sub>3</sub>O<sub>4</sub> nanocomposites as an anode

Mingbao Huang,<sup>a,b</sup> Caihong Chen,<sup>a,\*</sup> Songping Wu<sup>a,b,\*</sup> and Xiaodong Tian<sup>a,b</sup>

a- School of Chemistry and Chemical Engineering, South China University of Technology, Guangzhou, 510641, China.

b- Guangdong Key Laboratory of Fuel Cell Technology, Guangzhou, 510641, China.

\*Corresponding author. Fax&Tel: +86 -20- 87112897.

E-mail: chchchen@scut.edu.cn (Chen); chwsp@scut.edu.cn (Wu).

#### Crystal phase and microstructure for product without annealing

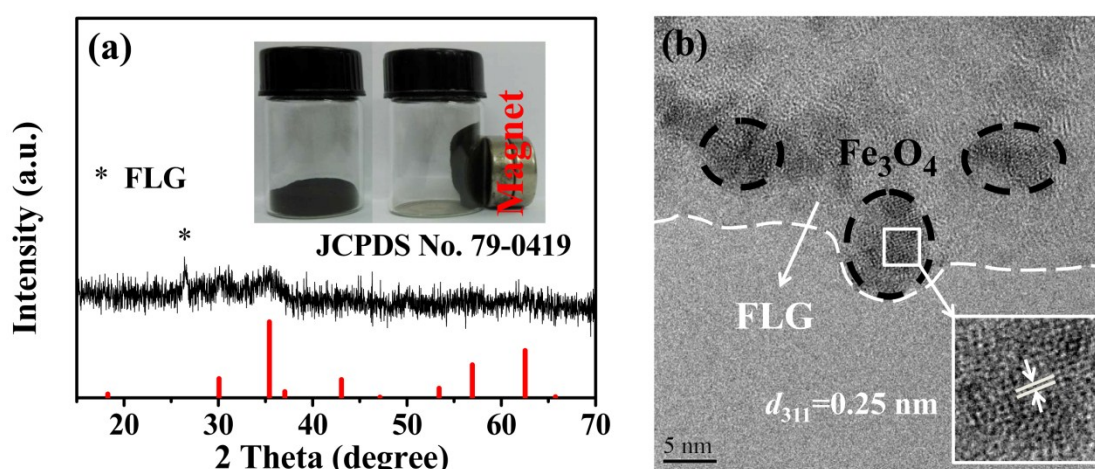

**Figure S1.** (a) XRD pattern and (b) TEM image of FLG-anchored Fe<sub>3</sub>O<sub>4</sub> nanocomposites without experiencing annealing treatment. The magnetic inspection was shown in the inset of (a).

XRD diffraction peaks are unobvious due to poor crystallinity, which also can be corroborated by crystal lattices in the TEM image (**Figure S1b**). A weak peak at 26° represents for specific diffraction of few-layer graphene. The materials show strong ferromagnetic property because the particles can be easily attracted to wall of small bottle by magnets (inset in **Figure S1a**).

## XRD patterns

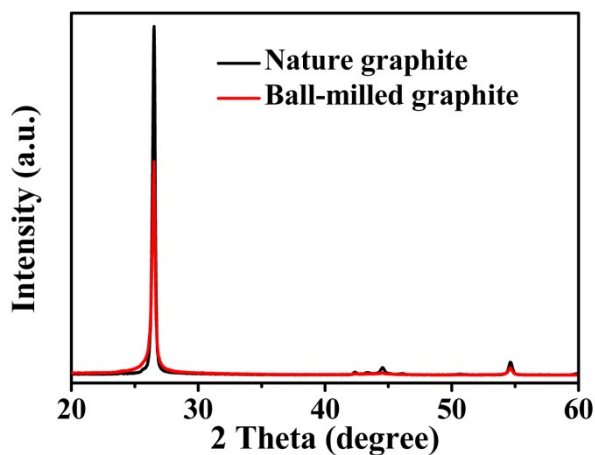

**Figure S2.** The XRD profiles of nature graphite and ball-milled graphite obtained at a similar condition without  $K_2FeO_4$ .

## FTIR spectra

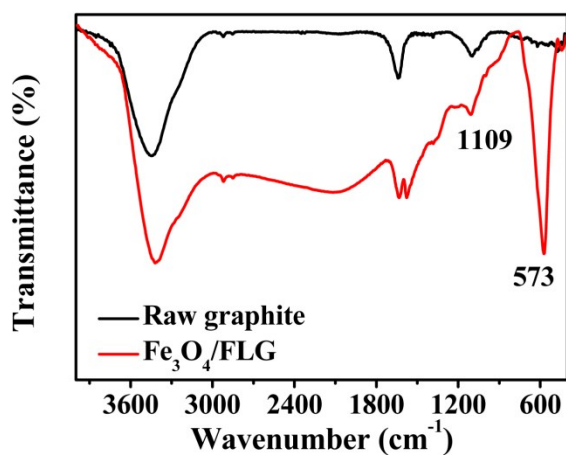

**Figure S3.** FTIR spectra of FLG-anchored  $Fe_3O_4$  ( $Fe_3O_4/FLG$ ) nanocomposites and raw graphite.

A strong and sharp peak at  $573\text{ cm}^{-1}$  appeared in FTIR spectrum of FLG-anchored  $Fe_3O_4$  nanocomposites, ascribed to the stretching vibration of Fe-O bond.<sup>1</sup> The C-O stretching at  $1109\text{ cm}^{-1}$  was detected in the raw graphite, and which presented in the final product with quite intensity. Compared with the spectrum of raw graphite, FLG-anchored  $Fe_3O_4$  nanocomposites don't show different peaks except for the peak of Fe-O.

## TEM and SEM images

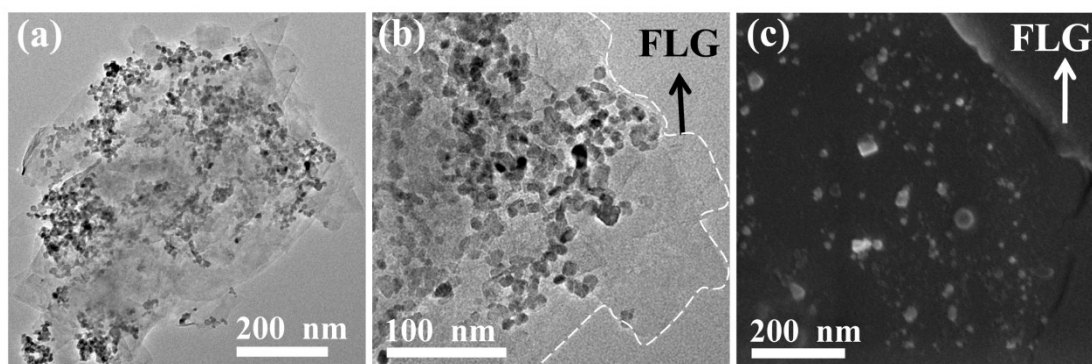

Figure S4. (a), (b) TEM images and (c) SEM image of FLG-anchored  $\text{Fe}_3\text{O}_4$  nanocomposites.

## BET test

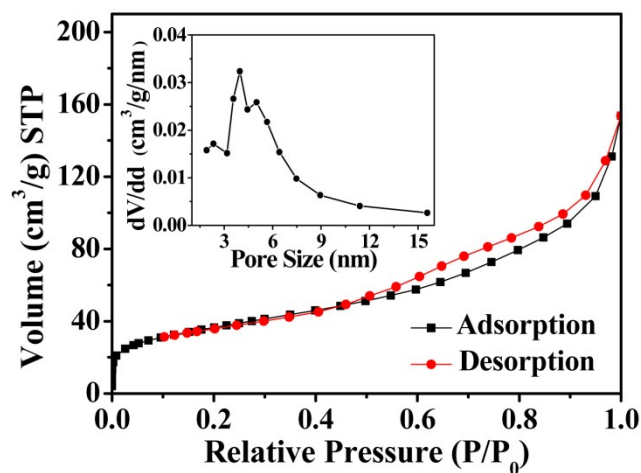

Figure S5.  $\text{N}_2$  adsorption/desorption isotherms of FLG-anchored  $\text{Fe}_3\text{O}_4$  nanocomposites. Pore size distribution was shown in the inset.

## TG analysis

In **Figure S6**, loss weight of 1.5 wt% around 100 °C responded to absorbed water, and increased weight of 2.5 wt% from 200 to 400 °C responded to the oxidation process of  $\text{Fe}_3\text{O}_4$  to  $\text{Fe}_2\text{O}_3$ . Subsequently, weight loss could be ascribed to oxidation of FLG. According to the formula:  $(23.75 + 2.5) / (100 - 1.5) \%$ , the content of FLG can be calculated to be 26.6%.

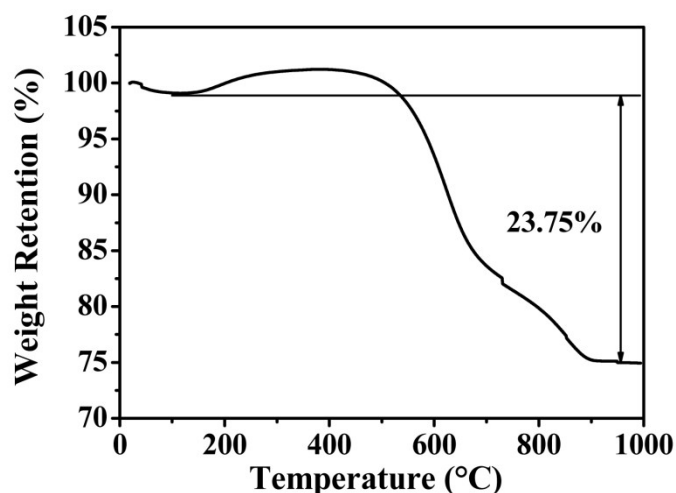

**Figure S6.** Thermogravimetric result of FLG-anchored Fe<sub>3</sub>O<sub>4</sub> nanocomposites.

### Capacity contribution of FLG

Firstly, as-prepared FLG-anchored Fe<sub>3</sub>O<sub>4</sub> nanomaterials were handled with acid for 5 hours to remove the Fe<sub>3</sub>O<sub>4</sub> species, and then washed for several times with distilled water and dried to obtain bare FLG. The FLG was used as anode material to measure its capacity contribution, as shown in [Figure S7](#).

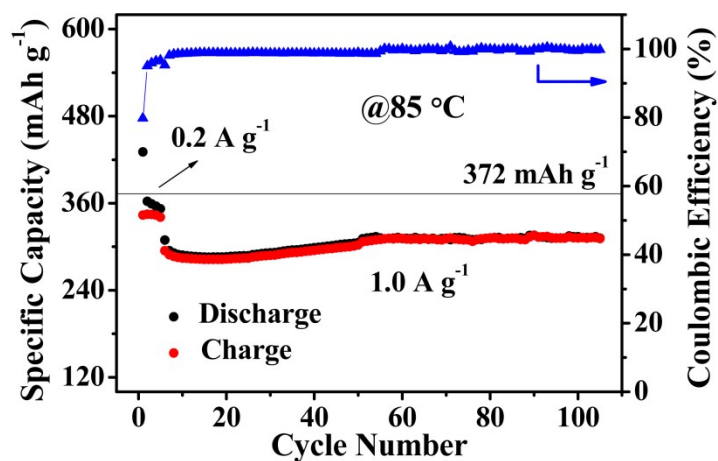

**Figure S7.** Electrochemical performance of as-obtained FLG with a current density of 0.2 A g<sup>-1</sup> for first five cycles and 1.0 A g<sup>-1</sup> for subsequent 100 cycles under 85 °C, and corresponding coulombic efficiency.

FLG exhibited a discharge capacity ~ 357 mAh g<sup>-1</sup> during the first five cycles. Subsequently, FLG could afford a reversible capacity of 372 mAh g<sup>-1</sup> after 100 cycles when operated at a current density of 1.0 A g<sup>-1</sup>. Under the high temperature, the as-obtained FLG has shown good rate performance and excellent cycling stability, with

approaching 100% retention rate of capacity. The average coulombic efficiency was about 98.8%.

Here, the total lithium-storage capacity of the whole composite was composed of capacity of FLG and capacity of  $\text{Fe}_3\text{O}_4$  according to **Eq.S1**:

$$\text{Total capacity}_{(\text{Composite})} = \text{Capacity}_{(\text{FLG})} \times \text{Content}_{(\text{FLG})} + \text{Capacity}_{(\text{Fe}_3\text{O}_4)} \times \text{Content}_{(\text{Fe}_3\text{O}_4)} \quad \text{Eq.S1}$$

The mass content of FLG was measured as 26.6% by TG analysis in **Figure S6**. At 105<sup>th</sup> cycle, the discharge capacity of FLG-anchored  $\text{Fe}_3\text{O}_4$  nanocomposites was 1413  $\text{mAh g}^{-1}$  (**Figure 5a**). Therefore, the capacity contribution of FLG toward total capacity could be calculated as follow:

$$\begin{aligned} \text{Contribution rate} &= [\text{Capacity}_{(\text{FLG})} \times \text{Content}_{(\text{FLG})} / \text{Total capacity}_{(\text{Composite})}] \\ &\quad \times 100\% \\ &= [312 \times 26.6\% / 1413] \times 100\% = 5.9\% \end{aligned}$$

### Electrochemical performance tests at room temperature

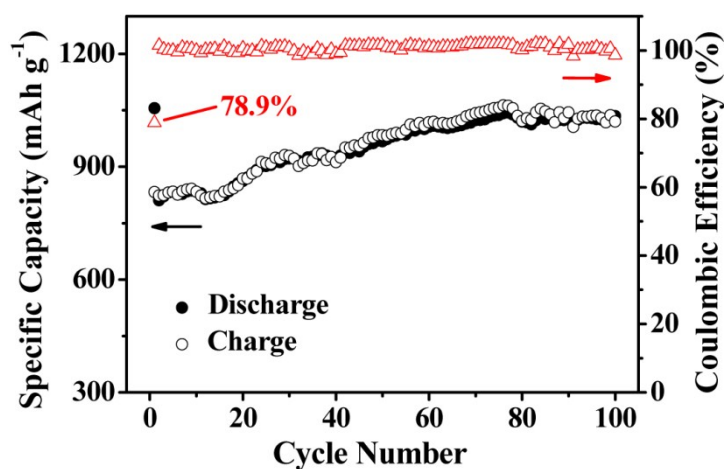

**Figure S8.** Cycling performance and coulombic efficiency of FLG-anchored  $\text{Fe}_3\text{O}_4$  nanocomposites at a current density of  $200 \text{ mA g}^{-1}$  at room temperature.

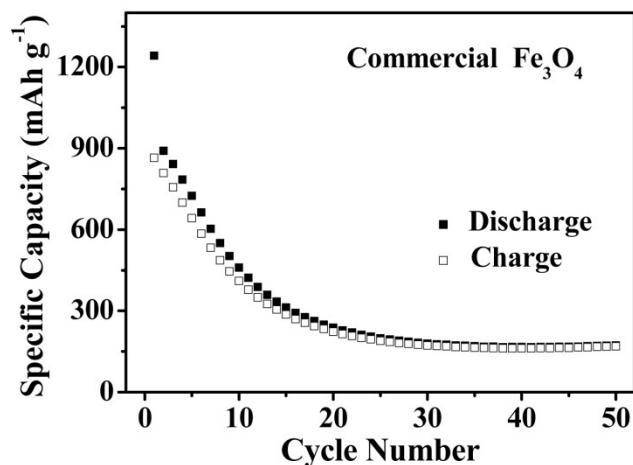

**Figure S9.** Cycling performance of commercial  $\text{Fe}_3\text{O}_4$  electrode at a current density of  $200 \text{ mA g}^{-1}$ .

The initial discharge/charge capacity were measured as  $1055/832 \text{ mAh g}^{-1}$  (**Figure S8**), with a high initial coulombic efficiency (CE) of 78.9% as compared with that in previous works (less than 70%).<sup>2-4</sup> The initial CE plays a very crucial factor, which determines irreversible degree of lithiation/delithiation reaction. About 21% capacity loss for the first cycle can be attributed to the formation of solid electrolyte interphase layer and irreversible lithiation process. The CE immediately reached approaching 100% at 2nd cycle, suggesting that stable SEI films have been molded during the first cycle. In the early stage of cycling (1 – 15 cycles), profile of reversible capacity was fairly stable due to strong two-dimensional anchoring structure, whereby we believed that the electrode materials were being gradually activated within the stage. After that, capacity of FLG-anchored  $\text{Fe}_3\text{O}_4$  nanocomposites experienced a visible ascending stage, up to a reversible capacity of  $1034 \text{ mAh g}^{-1}$  after 100 cycles, with average CE of 99.9% and capacity retention rate of 124%. As a sharp contrast, commercial  $\text{Fe}_3\text{O}_4$  afforded rapid decay of capacity from a high initial capacity of  $1242 \text{ mAh g}^{-1}$ , with capacity retention of only 13.6% after 50 charge/discharge cycles (**Figure S9**).

### Rate capability

In **Figure S10**, FLG-anchored  $\text{Fe}_3\text{O}_4$  nanocomposites delivered the specific capacities of 1059, 947, 847, 756, 673, 595, 542  $\text{mAh g}^{-1}$  at current densities of 100, 200, 400, 600, 800, 1000, 1200  $\text{mA g}^{-1}$ , respectively. The reversible capacity of this material could still return to  $1029 \text{ mAh g}^{-1}$  when current density decreased to 100  $\text{mA g}^{-1}$ , illustrating that this electrode material could maintain its structured integrity, dispelling obvious structural collapse after experiencing a large current impact. While

commercial  $\text{Fe}_3\text{O}_4$  electrodes merely afforded the capacities of 658, 462, 328, 221, 166, 131, 110  $\text{mAh g}^{-1}$ , respectively, and could not achieve effective recovery of capacity.

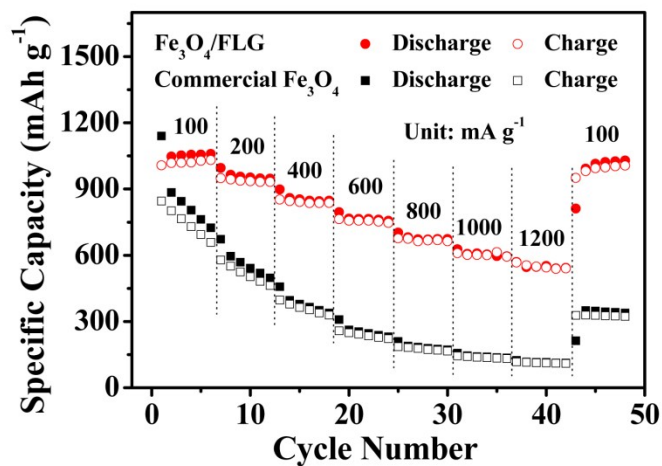

**Figure S10.** Rate performances of FLG-anchored  $\text{Fe}_3\text{O}_4$  ( $\text{Fe}_3\text{O}_4/\text{FLG}$ ) nanocomposites and commercial  $\text{Fe}_3\text{O}_4$  under different current densities from 100 to 1200  $\text{mA g}^{-1}$ .

### EIS measurements

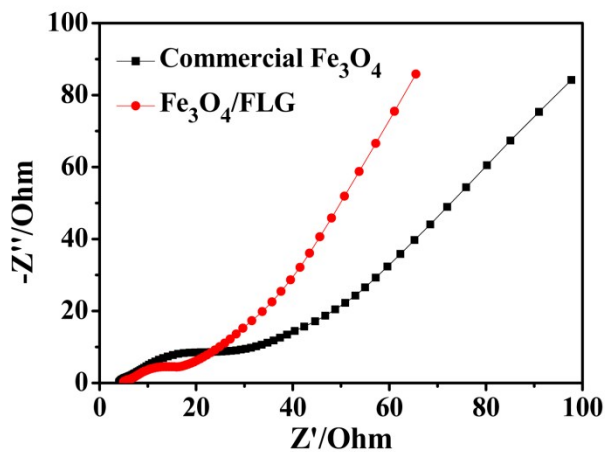

**Figure S11.** Nyquist plots of FLG-anchored  $\text{Fe}_3\text{O}_4$  ( $\text{Fe}_3\text{O}_4/\text{FLG}$ ) nanocomposites and commercial  $\text{Fe}_3\text{O}_4$  electrodes after the first discharge/charge cycle.



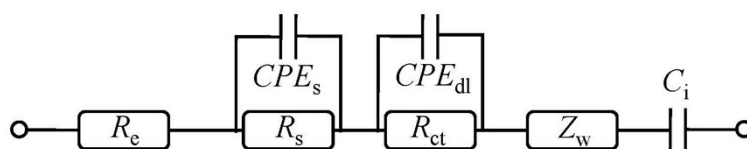

**Figure S12.** The equivalent circuit diagram of simulating FLG-anchored  $\text{Fe}_3\text{O}_4$  nanocomposites and commercial  $\text{Fe}_3\text{O}_4$  electrodes assembled in coin cells. ( $R_e$ : electrolyte resistance,  $R_s$ : SEI layer resistance,  $R_{ct}$ : charge transfer resistance,  $CPE_s$ : surface films capacitance,  $CPE_{dl}$ : double-layer capacitance,  $Z_w$ : Warburg impedance,  $C_i$ : intercalation capacitance.)

**Table S1.** Kinetic parameters of FLG-anchored  $\text{Fe}_3\text{O}_4$  nanocomposites and commercial  $\text{Fe}_3\text{O}_4$  electrodes, respectively.

| Sample                               | $R_e$ ( $\Omega$ ) | $R_s$ ( $\Omega$ ) | $R_{ct}$ ( $\Omega$ ) |
|--------------------------------------|--------------------|--------------------|-----------------------|
| FLG-anchored $\text{Fe}_3\text{O}_4$ | 5.257              | 1.921              | 6.792                 |
| Commercial $\text{Fe}_3\text{O}_4$   | 4.388              | 3.573              | 15.52                 |

By means of electrochemical impedance spectroscopy, influence of kinetic process for FLG-anchored  $\text{Fe}_3\text{O}_4$  nanocomposites and commercial  $\text{Fe}_3\text{O}_4$  electrodes on performance of half-cells were deeply explored (**Figure S11**). Based on the equivalent circuit (**Figure S12**), FLG-anchored  $\text{Fe}_3\text{O}_4$  nanocomposites possessed a smaller  $R_s$  (1.92  $\Omega$ ) and  $R_{ct}$  (6.8  $\Omega$ ) (**Table S1**), indicating that two-dimensional nanostructure was helpful to accelerate charge transfer between active material and electrolyte. An inclined line at the low frequency region was related to Warburg impedance. Larger slope for FLG-anchored  $\text{Fe}_3\text{O}_4$  nanocomposites suggested that faster lithium ions diffusion process in electrode materials.<sup>5</sup> Above results could be underlying causes of improved electrochemical performance.

### Electrochemical performance test at low temperature

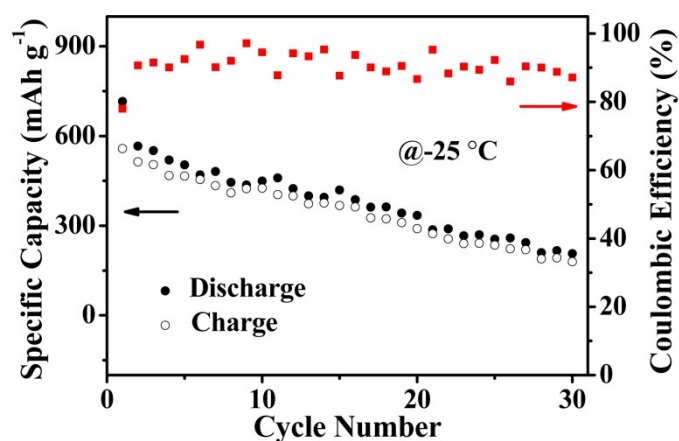

**Figure S13.** Cycling performance and coulombic efficiency of FLG-anchored  $\text{Fe}_3\text{O}_4$  nanocomposites with a current density of  $100 \text{ mA g}^{-1}$  at  $-25 \text{ }^\circ\text{C}$ .



To further realize their environmental adaptability, electrochemical response feature of FLG-anchored  $\text{Fe}_3\text{O}_4$  nanocomposites under a low temperature of  $-25\text{ }^\circ\text{C}$  was discussed, rendering a first discharge capacity of  $715\text{ mAh g}^{-1}$  at a current density of  $100\text{ mA g}^{-1}$ , with a high initial coulombic efficiency  $\sim 77.9\%$  (**Figure S13**), following with considerable retention capacity ( $207\text{ mAh g}^{-1}$ ) after 30 cycles. The average coulombic efficiency was  $90.6\%$ , less than that at room temperature, which may result from poor lithium ions diffusion and transfer under low temperature. Therefore, such an electrode could be operated at low temperature in spite of sluggish kinetic course.<sup>6,7</sup>

### Electrochemical performances under changeable temperature

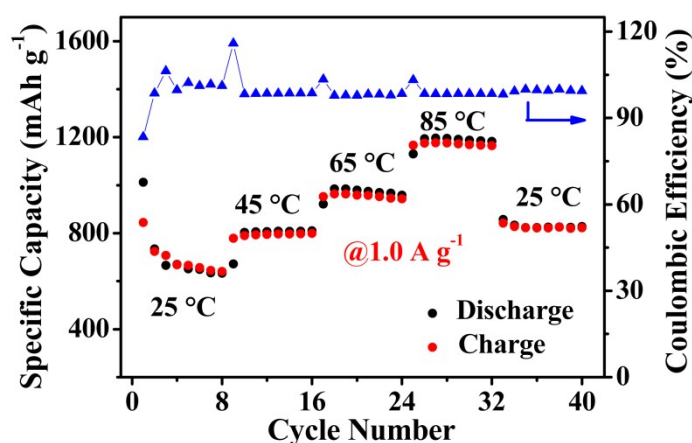

**Figure S14.** Corresponding electrochemical performances of FLG-anchored  $\text{Fe}_3\text{O}_4$  under different temperatures with a current density of  $1.0\text{ A g}^{-1}$ .

As shown in **Figure S14**, detailed researches about environmental adaptability of this material were carried out by altering operational temperatures at a current density of  $1.0\text{ A g}^{-1}$ . Very clearly, the specific capacities of battery gradually increased with temperature increasing. The corresponding discharge capacities were measured as  $634$ ,  $808$ ,  $966$  and  $1184\text{ mAh g}^{-1}$  at different temperatures of  $25$ ,  $45$ ,  $65$  and  $85\text{ }^\circ\text{C}$ , respectively. As expected, a satisfactory capacity  $\sim 823\text{ mAh g}^{-1}$  was obtained when operational temperature returned to room temperature, which fully revealed that few-layer graphene-anchored  $\text{Fe}_3\text{O}_4$  nanocomposites could be successfully operated under ever-changeable temperature.

**Table S2.** Physical properties and electrochemical performances of iron oxide-based anode materials

| Morphology                                                            | Synthesis method                               | Carbon content (%) | Current rate (mA g <sup>-1</sup> ) | Temperature (°C) | Cycle number | Capacity (mAh g <sup>-1</sup> ) | Retention rate (%)     | Ref.             |
|-----------------------------------------------------------------------|------------------------------------------------|--------------------|------------------------------------|------------------|--------------|---------------------------------|------------------------|------------------|
| Graphene-Fe <sub>3</sub> O <sub>4</sub>                               | Hydrothermal method                            | 8                  | 200                                | 25               | 60           | 637                             | 58                     | 8                |
| Hierarchical hollow Fe <sub>3</sub> O <sub>4</sub>                    | Thermal decomposition                          | 0                  | 1000                               | 25               | 50           | 851.9                           | 93                     | 9                |
| Fe <sub>3</sub> O <sub>4</sub> @rGO                                   | Hydrothermal method                            | /                  | 1000                               | 25               | 250          | 1260                            | 102                    | 10               |
| G/Fe <sub>3</sub> O <sub>4</sub> @C                                   | Hydrothermal method                            | 28.7               | 2000                               | 25               | 200          | 734                             | /                      | 1                |
| Graphene-wrapped Fe <sub>3</sub> O <sub>4</sub> -graphene nanoribbons | Na/K reduction and O <sub>2</sub> oxidization  | 40                 | 400                                | 25               | 300          | 708                             | 89                     | 11               |
| FeO <sub>x</sub> @C                                                   | Hydrothermal method / etching                  | 14                 | 200                                | 25               | 100          | 790                             | 97                     | 4                |
| Fe <sub>3</sub> O <sub>4</sub> nanorods/N-doped graphene              | Hydrothermal process / annealing               | 15                 | 100                                | 25               | 50           | 929                             | 115                    | 3                |
| Fe <sub>3</sub> O <sub>4</sub> /C                                     | Ball milling / carbothermal reduction          | 70                 | 100                                | 25               | 100          | 432                             | 95                     | 12               |
| Boron-containing iron oxide                                           | Ball milling / dynamically heating             | /                  | 100                                | 25               | 200          | 1148                            | 109                    | 13               |
|                                                                       |                                                |                    | <b>200</b>                         | <b>25</b>        | <b>100</b>   | <b>1034</b>                     | <b>124</b>             |                  |
| <b>FLG-anchored Fe<sub>3</sub>O<sub>4</sub> nanocomposites</b>        | <b>Ball milling followed by mild annealing</b> | <b>26.6</b>        | <b>1000</b>                        | <b>25</b>        | <b>100</b>   | <b>621</b>                      | <b>95 (after 10th)</b> | <b>This work</b> |
|                                                                       |                                                |                    | <b>1000</b>                        | <b>85</b>        | <b>100</b>   | <b>1413</b>                     | <b>126</b>             |                  |
|                                                                       |                                                |                    | <b>5000</b>                        | <b>85</b>        | <b>100</b>   | <b>768</b>                      | <b>89</b>              |                  |
|                                                                       |                                                |                    | <b>100</b>                         | <b>-25</b>       | <b>30</b>    | <b>207</b>                      | <b>38</b>              |                  |

## CV profiles at room temperature

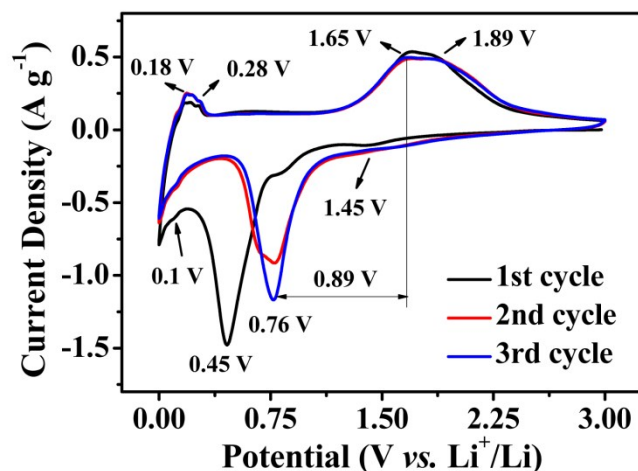

**Figure S15.** Cyclic voltammetry curves of FLG-anchored Fe<sub>3</sub>O<sub>4</sub> nanocomposites with a scanning rate of 0.5 mV s<sup>-1</sup> at room temperature.

## SAED pattern

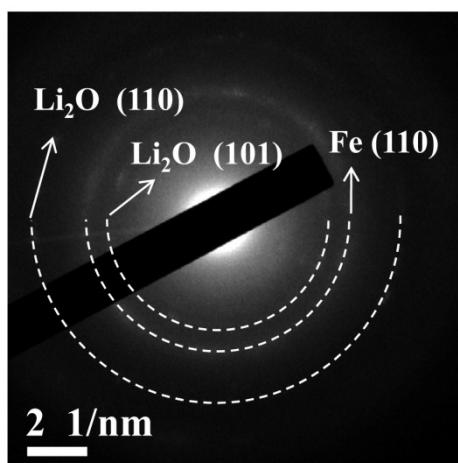

**Figure S16.** Corresponding SAED pattern recorded on the region of Figure 7(b).

## References:

1. X. Jiang, X. L. Yang, Y. H. Zhu, Y. F. Yao, P. Zhao and C. Z. Li, *J. Mater. Chem. A*, 2015, **3**, 2361-2369.
2. W. Zhang, X. Li, J. Liang, K. Tang, Y. Zhu and Y. Qian, *Nanoscale*, 2016, **8**, 4733-4741.
3. J. Jiao, W. Qiu, J. Tang, L. Chen and L. Jing, *Nano Res.*, 2016, **9**, 1256-1266.
4. H. Zhang, L. Zhou, O. Noonan, D. J. Martin, A. K. Whittaker and C. Yu, *Adv. Funct. Mater.*, 2014, **24**, 4337-4342.
5. Y. Jiang, D. Zhang, Y. Li, T. Yuan, N. Bahlawane, C. Liang, W. Sun, Y. Lu and M. Yan, *Nano Energy*, 2014, **4**, 23-30.
6. J.-Q. Huang, X.-F. Liu, Q. Zhang, C.-M. Chen, M.-Q. Zhao, S.-M. Zhang, W. Zhu, W.-Z. Qian and F. Wei, *Nano Energy*, 2013, **2**, 314-321.

7. A. Senyshyn, M. J. Mühlbauer, O. Dolotko and H. Ehrenberg, *J. Power Sources*, 2015, **282**, 235-240.
8. J. Su, M. Cao, L. Ren and C. Hu, *J. Phys. Chem. C*, 2011, **115**, 14469-14477.
9. Q. Q. Xiong, J. P. Tu, Y. Lu, J. Chen, Y. X. Yu, Y. Q. Qiao, X. L. Wang and C. D. Gu, *J. Phys. Chem. C*, 2012, **116**, 6495-6502.
10. Y. Jiang, Z. Jiang, L. Yang, S. Cheng and M. Liu, *J. Mater. Chem. A*, 2015, **3**, 11847-11856.
11. L. Li, A. Kovalchuk, H. Fei, Z. Peng, Y. Li, N. D. Kim, C. Xiang, Y. Yang, G. Ruan and J. M. Tour, *Adv. Energy Mater.*, 2015, **5**, 1500171.
12. P. Wang, M. Gao, H. Pan, J. Zhang, C. Liang, J. Wang, P. Zhou and Y. Liu, *J. Power Sources*, 2013, **239**, 466-474.
13. Y. Cao, Y. Yang, Z. Ren, N. Jian, M. Gao, Y. Wu, M. Zhu, F. Pan, Y. Liu and H. Pan, *Adv. Funct. Mater.*, 2017, **27**, 1700342.
